# Supplementary material
Source: PubMed Central journal article supplement (PMC6802510)
Supplement: supp_RA119.009000_145061_2_supp_380497_pwf730.pdf [file supp_RA119.009000_145061_2_supp_380497_pwf730.pdf]

[BLAST®](#) » [blastn suite](#) » RID-ZZN3UUXD015

### BLAST Results

[Questions/comments](#)

#### Job title: Nucleotide Sequence (25 letters)

**RID** [ZZN3UUXD015](#) (Expires on 11-30 18:58 pm)

**Query ID** |cl|Query\_109169  
**Description** None  
**Molecule type** nucleic acid  
**Query Length** 25

**Database Name** Human G+T (2 databases)  
**Description**  
**Program**BLASTN 2.8.1+

### Graphic Summary

Distribution of the top 197 Blast Hits on 97 subject sequences

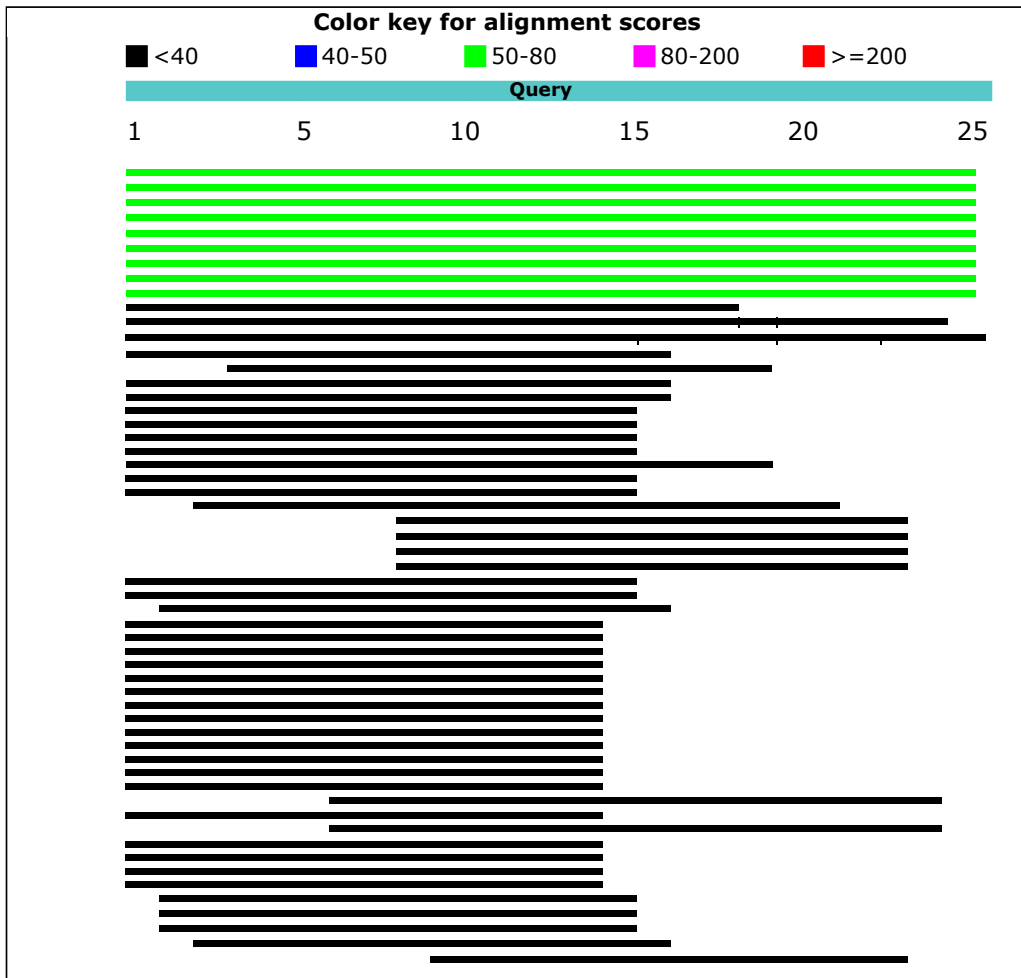

## Descriptions

Sequences producing significant alignments:

| Description                                                                                             | Max score | Total score | Query cover | E value | Ident | Accession                      |
|---------------------------------------------------------------------------------------------------------|-----------|-------------|-------------|---------|-------|--------------------------------|
| Transcripts                                                                                             |           |             |             |         |       |                                |
| Homo sapiens eukaryotic translation initiation factor 4 gamma 1 (EIF4G1), transcript variant 8, mRNA    | 50.1      | 50.1        | 100%        | 2e-05   | 100%  | <a href="#">NM_001291157.1</a> |
| Homo sapiens eukaryotic translation initiation factor 4 gamma 1 (EIF4G1), transcript variant 2, mRNA    | 50.1      | 50.1        | 100%        | 2e-05   | 100%  | <a href="#">NM_198241.2</a>    |
| Homo sapiens eukaryotic translation initiation factor 4 gamma 1 (EIF4G1), transcript variant 7, mRNA    | 50.1      | 50.1        | 100%        | 2e-05   | 100%  | <a href="#">NM_001194947.1</a> |
| Homo sapiens eukaryotic translation initiation factor 4 gamma 1 (EIF4G1), transcript variant 6, mRNA    | 50.1      | 50.1        | 100%        | 2e-05   | 100%  | <a href="#">NM_001194946.1</a> |
| Homo sapiens eukaryotic translation initiation factor 4 gamma 1 (EIF4G1), transcript variant 3, mRNA    | 50.1      | 50.1        | 100%        | 2e-05   | 100%  | <a href="#">NM_198244.2</a>    |
| Homo sapiens eukaryotic translation initiation factor 4 gamma 1 (EIF4G1), transcript variant 4, mRNA    | 50.1      | 50.1        | 100%        | 2e-05   | 100%  | <a href="#">NM_198242.2</a>    |
| Homo sapiens eukaryotic translation initiation factor 4 gamma 1 (EIF4G1), transcript variant 5, mRNA    | 50.1      | 50.1        | 100%        | 2e-05   | 100%  | <a href="#">NM_004953.4</a>    |
| Homo sapiens eukaryotic translation initiation factor 4 gamma 1 (EIF4G1), transcript variant 1, mRNA    | 50.1      | 50.1        | 100%        | 2e-05   | 100%  | <a href="#">NM_182917.4</a>    |
| Homo sapiens fibroblast growth factor 23 (FGF23), mRNA                                                  | 36.2      | 36.2        | 72%         | 0.34    | 100%  | <a href="#">NM_020638.2</a>    |
| PREDICTED: Homo sapiens cyclin dependent kinase 13 (CDK13), transcript variant X2, mRNA                 | 30.2      | 30.2        | 60%         | 21      | 100%  | <a href="#">XM_017012751.2</a> |
| PREDICTED: Homo sapiens cyclin dependent kinase 13 (CDK13), transcript variant X1, mRNA                 | 30.2      | 30.2        | 60%         | 21      | 100%  | <a href="#">XM_017012750.2</a> |
| Homo sapiens cyclin dependent kinase 13 (CDK13), transcript variant 2, mRNA                             | 30.2      | 30.2        | 60%         | 21      | 100%  | <a href="#">NM_031267.3</a>    |
| Homo sapiens cyclin dependent kinase 13 (CDK13), transcript variant 1, mRNA                             | 30.2      | 30.2        | 60%         | 21      | 100%  | <a href="#">NM_003718.4</a>    |
| PREDICTED: Homo sapiens ubiquitin like modifier activating enzyme 3 (UBA3), transcript variant X2, mRNA | 30.2      | 30.2        | 60%         | 21      | 100%  | <a href="#">XM_011534211.1</a> |
| PREDICTED: Homo sapiens ubiquitin like modifier activating enzyme 3 (UBA3), transcript variant X1, mRNA | 30.2      | 30.2        | 60%         | 21      | 100%  | <a href="#">XM_011534210.1</a> |
| Homo sapiens ubiquitin like modifier activating enzyme 3 (UBA3), transcript variant 2, mRNA             | 30.2      | 30.2        | 60%         | 21      | 100%  | <a href="#">NM_198195.1</a>    |
| Homo sapiens ubiquitin like modifier activating enzyme 3 (UBA3), transcript variant 1, mRNA             | 30.2      | 30.2        | 60%         | 21      | 100%  | <a href="#">NM_003968.3</a>    |
| PREDICTED: Homo sapiens zinc finger protein 273 (ZNF273), transcript variant X7, mRNA                   | 28.2      | 28.2        | 56%         | 84      | 100%  | <a href="#">XM_024446641.1</a> |
| PREDICTED: Homo sapiens zinc finger protein 273 (ZNF273), transcript variant X6, mRNA                   | 28.2      | 28.2        | 56%         | 84      | 100%  | <a href="#">XM_024446640.1</a> |
| PREDICTED: Homo sapiens zinc finger protein 273 (ZNF273), transcript variant X5, mRNA                   | 28.2      | 28.2        | 56%         | 84      | 100%  | <a href="#">XM_024446639.1</a> |

| Description                                                                                                      | Max score | Total score | Query cover | E value | Ident | Accession                      |
|------------------------------------------------------------------------------------------------------------------|-----------|-------------|-------------|---------|-------|--------------------------------|
| PREDICTED: Homo sapiens zinc finger protein 273 (ZNF273), transcript variant X4, mRNA                            | 28.2      | 28.2        | 56%         | 84      | 100%  | <a href="#">XM_024446638.1</a> |
| PREDICTED: Homo sapiens zinc finger protein 273 (ZNF273), transcript variant X3, mRNA                            | 28.2      | 28.2        | 56%         | 84      | 100%  | <a href="#">XM_024446637.1</a> |
| PREDICTED: Homo sapiens zinc finger protein 273 (ZNF273), transcript variant X2, mRNA                            | 28.2      | 28.2        | 56%         | 84      | 100%  | <a href="#">XM_024446636.1</a> |
| PREDICTED: Homo sapiens zinc finger protein 273 (ZNF273), transcript variant X1, mRNA                            | 28.2      | 28.2        | 56%         | 84      | 100%  | <a href="#">XM_024446635.1</a> |
| PREDICTED: Homo sapiens adhesion G protein-coupled receptor B3 (ADGRB3), transcript variant X8, mRNA             | 28.2      | 28.2        | 56%         | 84      | 100%  | <a href="#">XM_011536011.3</a> |
| PREDICTED: Homo sapiens adhesion G protein-coupled receptor B3 (ADGRB3), transcript variant X7, mRNA             | 28.2      | 28.2        | 56%         | 84      | 100%  | <a href="#">XM_024446503.1</a> |
| PREDICTED: Homo sapiens adhesion G protein-coupled receptor B3 (ADGRB3), transcript variant X6, mRNA             | 28.2      | 28.2        | 56%         | 84      | 100%  | <a href="#">XM_024446502.1</a> |
| PREDICTED: Homo sapiens adhesion G protein-coupled receptor B3 (ADGRB3), transcript variant X5, mRNA             | 28.2      | 28.2        | 56%         | 84      | 100%  | <a href="#">XM_024446501.1</a> |
| PREDICTED: Homo sapiens adhesion G protein-coupled receptor B3 (ADGRB3), transcript variant X1, mRNA             | 28.2      | 28.2        | 56%         | 84      | 100%  | <a href="#">XM_005248752.3</a> |
| PREDICTED: Homo sapiens uncharacterized LOC112268421 (LOC112268421), ncRNA                                       | 28.2      | 28.2        | 56%         | 84      | 100%  | <a href="#">XR_002959410.1</a> |
| PREDICTED: Homo sapiens uncharacterized LOC105378536 (LOC105378536), transcript variant X4, ncRNA                | 28.2      | 28.2        | 72%         | 84      | 94%   | <a href="#">XR_953252.2</a>    |
| PREDICTED: Homo sapiens adhesion G protein-coupled receptor B3 (ADGRB3), transcript variant X4, mRNA             | 28.2      | 28.2        | 56%         | 84      | 100%  | <a href="#">XM_011536009.2</a> |
| PREDICTED: Homo sapiens uncharacterized LOC105378536 (LOC105378536), transcript variant X4, ncRNA                | 28.2      | 28.2        | 72%         | 84      | 94%   | <a href="#">XR_946428.2</a>    |
| Homo sapiens adhesion G protein-coupled receptor B3 (ADGRB3), mRNA                                               | 28.2      | 28.2        | 56%         | 84      | 100%  | <a href="#">NM_001704.2</a>    |
| Homo sapiens zinc finger protein 273 (ZNF273), transcript variant 1, mRNA                                        | 28.2      | 28.2        | 56%         | 84      | 100%  | <a href="#">NM_021148.2</a>    |
| Homo sapiens zinc finger protein 273 (ZNF273), transcript variant 2, non-coding RNA                              | 28.2      | 28.2        | 56%         | 84      | 100%  | <a href="#">NR_003099.1</a>    |
| PREDICTED: Homo sapiens erythrocyte membrane protein band 4.1 like 2 (EPB41L2), transcript variant X15, mRNA     | 28.2      | 28.2        | 56%         | 84      | 100%  | <a href="#">XM_024446349.1</a> |
| PREDICTED: Homo sapiens erythrocyte membrane protein band 4.1 like 2 (EPB41L2), transcript variant X13, misc_RNA | 28.2      | 28.2        | 56%         | 84      | 100%  | <a href="#">XR_001743217.2</a> |
| PREDICTED: Homo sapiens erythrocyte membrane protein band 4.1 like 2 (EPB41L2), transcript variant X12, misc_RNA | 28.2      | 28.2        | 56%         | 84      | 100%  | <a href="#">XR_001743216.2</a> |

| Description                                                                                                      | Max score | Total score | Query cover | E value | Ident | Accession                      |
|------------------------------------------------------------------------------------------------------------------|-----------|-------------|-------------|---------|-------|--------------------------------|
| PREDICTED: Homo sapiens erythrocyte membrane protein band 4.1 like 2 (EPB41L2), transcript variant X11, misc_RNA | 28.2      | 28.2        | 56%         | 84      | 100%  | <a href="#">XR_001743215.2</a> |
| PREDICTED: Homo sapiens erythrocyte membrane protein band 4.1 like 2 (EPB41L2), transcript variant X10, mRNA     | 28.2      | 28.2        | 56%         | 84      | 100%  | <a href="#">XM_011535528.2</a> |
| PREDICTED: Homo sapiens erythrocyte membrane protein band 4.1 like 2 (EPB41L2), transcript variant X9, mRNA      | 28.2      | 28.2        | 56%         | 84      | 100%  | <a href="#">XM_017010356.2</a> |
| PREDICTED: Homo sapiens erythrocyte membrane protein band 4.1 like 2 (EPB41L2), transcript variant X8, mRNA      | 28.2      | 28.2        | 56%         | 84      | 100%  | <a href="#">XM_011535527.2</a> |
| PREDICTED: Homo sapiens erythrocyte membrane protein band 4.1 like 2 (EPB41L2), transcript variant X7, mRNA      | 28.2      | 28.2        | 56%         | 84      | 100%  | <a href="#">XM_011535525.2</a> |
| PREDICTED: Homo sapiens erythrocyte membrane protein band 4.1 like 2 (EPB41L2), transcript variant X6, mRNA      | 28.2      | 28.2        | 56%         | 84      | 100%  | <a href="#">XM_017010353.2</a> |
| PREDICTED: Homo sapiens erythrocyte membrane protein band 4.1 like 2 (EPB41L2), transcript variant X5, misc_RNA  | 28.2      | 28.2        | 56%         | 84      | 100%  | <a href="#">XR_001743213.2</a> |
| PREDICTED: Homo sapiens erythrocyte membrane protein band 4.1 like 2 (EPB41L2), transcript variant X2, mRNA      | 28.2      | 28.2        | 56%         | 84      | 100%  | <a href="#">XM_017010350.2</a> |
| PREDICTED: Homo sapiens erythrocyte membrane protein band 4.1 like 2 (EPB41L2), transcript variant X1, mRNA      | 28.2      | 28.2        | 56%         | 84      | 100%  | <a href="#">XM_011535524.2</a> |
| Homo sapiens erythrocyte membrane protein band 4.1 like 2 (EPB41L2), transcript variant 20, mRNA                 | 28.2      | 28.2        | 56%         | 84      | 100%  | <a href="#">NM_001350313.1</a> |
| Homo sapiens erythrocyte membrane protein band 4.1 like 2 (EPB41L2), transcript variant 18, mRNA                 | 28.2      | 28.2        | 56%         | 84      | 100%  | <a href="#">NM_001350311.1</a> |
| Homo sapiens erythrocyte membrane protein band 4.1 like 2 (EPB41L2), transcript variant 13, mRNA                 | 28.2      | 28.2        | 56%         | 84      | 100%  | <a href="#">NM_001350306.1</a> |
| Homo sapiens erythrocyte membrane protein band 4.1 like 2 (EPB41L2), transcript variant 17, mRNA                 | 28.2      | 28.2        | 56%         | 84      | 100%  | <a href="#">NM_001350310.1</a> |
| Homo sapiens erythrocyte membrane protein band 4.1 like 2 (EPB41L2), transcript variant 10, mRNA                 | 28.2      | 28.2        | 56%         | 84      | 100%  | <a href="#">NM_001350303.1</a> |
| Homo sapiens erythrocyte membrane protein band 4.1 like 2 (EPB41L2), transcript variant 12, mRNA                 | 28.2      | 28.2        | 56%         | 84      | 100%  | <a href="#">NM_001350305.1</a> |
| Homo sapiens erythrocyte membrane protein band 4.1 like 2 (EPB41L2), transcript variant 15, mRNA                 | 28.2      | 28.2        | 56%         | 84      | 100%  | <a href="#">NM_001350308.1</a> |
| Homo sapiens erythrocyte membrane protein band 4.1 like 2 (EPB41L2), transcript variant 19, mRNA                 | 28.2      | 28.2        | 56%         | 84      | 100%  | <a href="#">NM_001350312.1</a> |
| Homo sapiens erythrocyte membrane protein band 4.1 like 2 (EPB41L2), transcript variant 14, mRNA                 | 28.2      | 28.2        | 56%         | 84      | 100%  | <a href="#">NM_001350307.1</a> |
| Homo sapiens erythrocyte membrane protein band 4.1 like 2 (EPB41L2), transcript variant 22, mRNA                 | 28.2      | 28.2        | 56%         | 84      | 100%  | <a href="#">NM_001350315.1</a> |

| Description                                                                                                 | Max score | Total score | Query cover | E value | Ident | Accession                      |
|-------------------------------------------------------------------------------------------------------------|-----------|-------------|-------------|---------|-------|--------------------------------|
| Homo sapiens erythrocyte membrane protein band 4.1 like 2 (EPB41L2), transcript variant 8, mRNA             | 28.2      | 28.2        | 56%         | 84      | 100%  | <a href="#">NM_001350301.1</a> |
| Homo sapiens erythrocyte membrane protein band 4.1 like 2 (EPB41L2), transcript variant 21, mRNA            | 28.2      | 28.2        | 56%         | 84      | 100%  | <a href="#">NM_001350314.1</a> |
| Homo sapiens erythrocyte membrane protein band 4.1 like 2 (EPB41L2), transcript variant 11, mRNA            | 28.2      | 28.2        | 56%         | 84      | 100%  | <a href="#">NM_001350304.1</a> |
| Homo sapiens erythrocyte membrane protein band 4.1 like 2 (EPB41L2), transcript variant 7, mRNA             | 28.2      | 28.2        | 56%         | 84      | 100%  | <a href="#">NM_001350299.1</a> |
| Homo sapiens erythrocyte membrane protein band 4.1 like 2 (EPB41L2), transcript variant 9, mRNA             | 28.2      | 28.2        | 56%         | 84      | 100%  | <a href="#">NM_001350302.1</a> |
| Homo sapiens erythrocyte membrane protein band 4.1 like 2 (EPB41L2), transcript variant 16, mRNA            | 28.2      | 28.2        | 56%         | 84      | 100%  | <a href="#">NM_001350309.1</a> |
| PREDICTED: Homo sapiens erythrocyte membrane protein band 4.1 like 2 (EPB41L2), transcript variant X4, mRNA | 28.2      | 28.2        | 56%         | 84      | 100%  | <a href="#">XM_017010352.1</a> |
| PREDICTED: Homo sapiens erythrocyte membrane protein band 4.1 like 2 (EPB41L2), transcript variant X3, mRNA | 28.2      | 28.2        | 56%         | 84      | 100%  | <a href="#">XM_017010351.1</a> |
| PREDICTED: Homo sapiens uncharacterized LOC107986059 (LOC107986059), ncRNA                                  | 28.2      | 28.2        | 56%         | 84      | 100%  | <a href="#">XR_001740585.1</a> |
| PREDICTED: Homo sapiens transcriptional adaptor 2A (TADA2A), transcript variant X8, mRNA                    | 28.2      | 28.2        | 56%         | 84      | 100%  | <a href="#">XM_017024985.1</a> |
| PREDICTED: Homo sapiens transcriptional adaptor 2A (TADA2A), transcript variant X6, mRNA                    | 28.2      | 28.2        | 56%         | 84      | 100%  | <a href="#">XM_017024983.1</a> |
| PREDICTED: Homo sapiens transcriptional adaptor 2A (TADA2A), transcript variant X5, mRNA                    | 28.2      | 28.2        | 56%         | 84      | 100%  | <a href="#">XM_006722044.3</a> |
| Homo sapiens erythrocyte membrane protein band 4.1 like 2 (EPB41L2), transcript variant 6, mRNA             | 28.2      | 28.2        | 56%         | 84      | 100%  | <a href="#">NM_001252660.1</a> |
| Genomic sequences[<br><a href="#">show first</a><br>]                                                       |           |             |             |         |       |                                |
| Homo sapiens chromosome 3, GRCh38.p12 Primary Assembly                                                      | 50.1      | 1289        | 100%        | 2e-05   | 100%  | <a href="#">NC_000003.12</a>   |
| Homo sapiens chromosome 12, GRCh38.p12 Primary Assembly                                                     | 36.2      | 696         | 96%         | 0.34    | 100%  | <a href="#">NC_000012.12</a>   |
| Homo sapiens chromosome 2, GRCh38.p12 Primary Assembly                                                      | 32.2      | 1928        | 100%        | 5.4     | 100%  | <a href="#">NC_000002.12</a>   |
| Homo sapiens chromosome 4, GRCh38.p12 Primary Assembly                                                      | 32.2      | 1490        | 100%        | 5.4     | 100%  | <a href="#">NC_000004.12</a>   |
| Homo sapiens chromosome 10, GRCh38.p12 Primary Assembly                                                     | 32.2      | 1068        | 100%        | 5.4     | 100%  | <a href="#">NC_000010.11</a>   |
| Homo sapiens chromosome 13, GRCh38.p12 Primary Assembly                                                     | 32.2      | 434         | 100%        | 5.4     | 100%  | <a href="#">NC_000013.11</a>   |
| Homo sapiens chromosome 6, GRCh38.p12 Primary Assembly                                                      | 32.2      | 943         | 100%        | 5.4     | 100%  | <a href="#">NC_000006.12</a>   |
| Homo sapiens chromosome 5, GRCh38.p12 Primary Assembly                                                      | 30.2      | 795         | 92%         | 21      | 95%   | <a href="#">NC_000005.10</a>   |
| Homo sapiens chromosome 7, GRCh38.p12 Primary Assembly                                                      | 30.2      | 787         | 100%        | 21      | 100%  | <a href="#">NC_000007.14</a>   |
| Homo sapiens chromosome 8, GRCh38.p12 Primary Assembly                                                      | 30.2      | 803         | 96%         | 21      | 100%  | <a href="#">NC_000008.11</a>   |

| Description                                                                                                 | Max score | Total score | Query cover | E value | Ident | Accession                    |
|-------------------------------------------------------------------------------------------------------------|-----------|-------------|-------------|---------|-------|------------------------------|
| Homo sapiens chromosome 9, GRCh38.p12 Primary Assembly                                                      | 30.2      | 832         | 100%        | 21      | 95%   | <a href="#">NC_000009.12</a> |
| Homo sapiens chromosome 18, GRCh38.p12 Primary Assembly                                                     | 30.2      | 480         | 96%         | 21      | 100%  | <a href="#">NC_000018.10</a> |
| Homo sapiens chromosome 20, GRCh38.p12 Primary Assembly                                                     | 30.2      | 381         | 92%         | 21      | 100%  | <a href="#">NC_000020.11</a> |
| Homo sapiens chromosome X, GRCh38.p12 Primary Assembly                                                      | 30.2      | 1038        | 88%         | 21      | 100%  | <a href="#">NC_000023.11</a> |
| Homo sapiens chromosome 1, GRCh38.p12 Primary Assembly                                                      | 28.2      | 878         | 92%         | 84      | 100%  | <a href="#">NC_000001.11</a> |
| Homo sapiens chromosome 14, GRCh38.p12 Primary Assembly                                                     | 28.2      | 369         | 100%        | 84      | 100%  | <a href="#">NC_000014.9</a>  |
| Homo sapiens chromosome 16, GRCh38.p12 Primary Assembly                                                     | 28.2      | 668         | 92%         | 84      | 100%  | <a href="#">NC_000016.10</a> |
| Homo sapiens chromosome 17, GRCh38.p12 Primary Assembly                                                     | 28.2      | 403         | 88%         | 84      | 100%  | <a href="#">NC_000017.11</a> |
| Homo sapiens chromosome 19, GRCh38.p12 Primary Assembly                                                     | 28.2      | 161         | 64%         | 84      | 100%  | <a href="#">NC_000019.10</a> |
| Homo sapiens chromosome 21, GRCh38.p12 Primary Assembly                                                     | 28.2      | 240         | 92%         | 84      | 100%  | <a href="#">NC_000021.9</a>  |
| Homo sapiens chromosome 11, GRCh38.p12 Primary Assembly                                                     | 28.2      | 634         | 88%         | 84      | 100%  | <a href="#">NC_000011.10</a> |
| Homo sapiens chromosome 15, GRCh38.p12 Primary Assembly                                                     | 28.2      | 264         | 92%         | 84      | 100%  | <a href="#">NC_000015.10</a> |
| Homo sapiens chromosome 17 genomic scaffold, GRCh38.p12 alternate locus group ALT_REF_LOCI_1 HSCHR17_7_CTG4 | 28.2      | 28.2        | 56%         | 84      | 100%  | <a href="#">NT_187614.1</a>  |
| Homo sapiens chromosome 16 unlocalized genomic scaffold, GRCh38.p12 Primary Assembly HSCHR16_RANDOM_CTG1    | 28.2      | 28.2        | 56%         | 84      | 100%  | <a href="#">NT_187383.1</a>  |
| Homo sapiens chromosome 22, GRCh38.p12 Primary Assembly                                                     | 26.3      | 183         | 68%         | 332     | 100%  | <a href="#">NC_000022.11</a> |
| Homo sapiens chromosome Y, GRCh38.p12 Primary Assembly                                                      | 26.3      | 26.3        | 52%         | 332     | 100%  | <a href="#">NC_000024.10</a> |

## Alignments

Homo sapiens eukaryotic translation initiation factor 4 gamma 1 (EIF4G1), transcript variant 8, mRNA  
Sequence ID: **NM\_001291157.1** Length: 5581 Number of Matches: 1  
Range 1: 2845 to 2869

| Score         | Expect  | Identities  | Gaps     | Strand    | Frame |
|---------------|---------|-------------|----------|-----------|-------|
| 50.1 bits(25) | 2e-05() | 25/25(100%) | 0/25(0%) | Plus/Plus |       |

Features:

```

Query 1      AAGCTGTTGTTGAATCGATGTCAGA 25
           |||
Sbjct 2845  AAGCTGTTGTTGAATCGATGTCAGA 2869

```

Homo sapiens eukaryotic translation initiation factor 4 gamma 1 (EIF4G1), transcript variant 2, mRNA  
Sequence ID: **NM\_198241.2** Length: 5538 Number of Matches: 1  
Range 1: 2792 to 2816

| Score         | Expect  | Identities  | Gaps     | Strand    | Frame |
|---------------|---------|-------------|----------|-----------|-------|
| 50.1 bits(25) | 2e-05() | 25/25(100%) | 0/25(0%) | Plus/Plus |       |

Features:

```

Query 1      AAGCTGTTGTTGAATCGATGTCAGA 25
           |||
Sbjct 2792  AAGCTGTTGTTGAATCGATGTCAGA 2816

```

Homo sapiens eukaryotic translation initiation factor 4 gamma 1 (EIF4G1), transcript variant 7, mRNA  
 Sequence ID: **NM\_001194947.1** Length: 5502 Number of Matches: 1  
 Range 1: 2756 to 2780

| Score         | Expect  | Identities  | Gaps     | Strand    | Frame |
|---------------|---------|-------------|----------|-----------|-------|
| 50.1 bits(25) | 2e-05() | 25/25(100%) | 0/25(0%) | Plus/Plus |       |

Features:

```

Query 1      AAGCTGTTGTTGAATCGATGTCAGA 25
           |||
Sbjct 2756  AAGCTGTTGTTGAATCGATGTCAGA 2780
  
```

Homo sapiens eukaryotic translation initiation factor 4 gamma 1 (EIF4G1), transcript variant 6, mRNA  
 Sequence ID: **NM\_001194946.1** Length: 5559 Number of Matches: 1  
 Range 1: 2813 to 2837

| Score         | Expect  | Identities  | Gaps     | Strand    | Frame |
|---------------|---------|-------------|----------|-----------|-------|
| 50.1 bits(25) | 2e-05() | 25/25(100%) | 0/25(0%) | Plus/Plus |       |

Features:

```

Query 1      AAGCTGTTGTTGAATCGATGTCAGA 25
           |||
Sbjct 2813  AAGCTGTTGTTGAATCGATGTCAGA 2837
  
```

Homo sapiens eukaryotic translation initiation factor 4 gamma 1 (EIF4G1), transcript variant 3, mRNA  
 Sequence ID: **NM\_198244.2** Length: 5300 Number of Matches: 1  
 Range 1: 2554 to 2578

| Score         | Expect  | Identities  | Gaps     | Strand    | Frame |
|---------------|---------|-------------|----------|-----------|-------|
| 50.1 bits(25) | 2e-05() | 25/25(100%) | 0/25(0%) | Plus/Plus |       |

Features:

```

Query 1      AAGCTGTTGTTGAATCGATGTCAGA 25
           |||
Sbjct 2554  AAGCTGTTGTTGAATCGATGTCAGA 2578
  
```

BLAST is a registered trademark of the National Library of Medicine

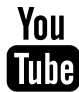

[Support center](#) [Mailing list](#)

[YouTube](#)

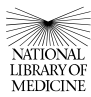

[National Library Of Medicine](#)

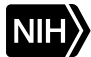

[National Institutes Of Health](#)

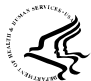

[U.S. Department of Health & Human Services](#)

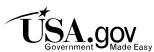

[USA.gov](#)

## NCBI

[National Center for Biotechnology Information](#), [U.S. National Library of Medicine](#) 8600 Rockville Pike, Bethesda MD, 20894 USA  
[Policies and Guidelines](#) | [Contact](#)
