# Supplementary material
Source: PubMed Central journal article supplement (PMC6802510)
Supplement: supp_RA119.009000_145061_2_supp_385043_pwvv1v.pdf [file supp_RA119.009000_145061_2_supp_385043_pwvv1v.pdf]

**Figure S1**

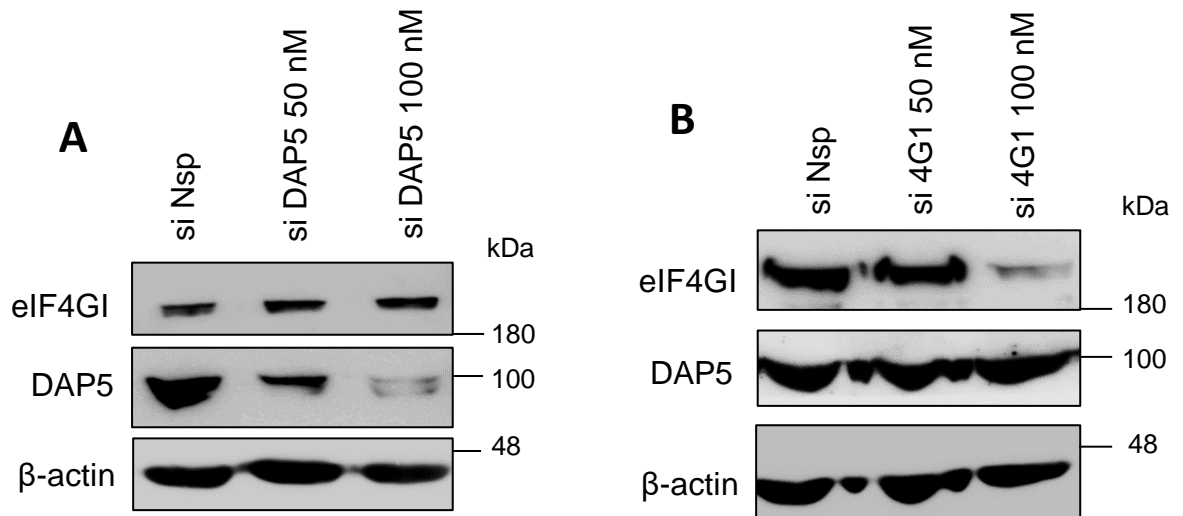

**Figure S1: Specificity of the siRNAs used in the study.** **A.** Western blots showing the DAP5 and eIF4GI protein levels upon si DAP5 treatment. **B.** Western blots showing the DAP5 and eIF4GI protein levels upon silencing using si eIF4GI. β-Actin protein levels are indicated as loading control.

## Figure S2

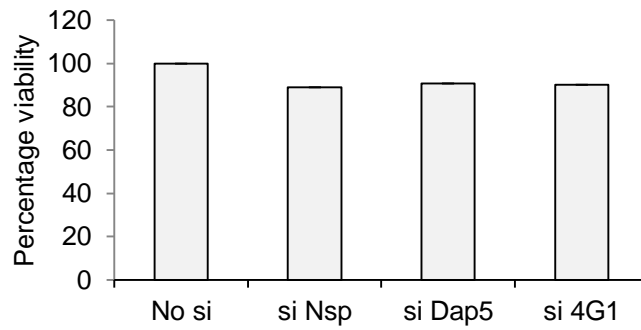

**Figure S2:** MTT assay performed on cells transfected with either siDAP5, si4GI or siNsp. At 30 hours post transfection, cells were treated with 0.5 mg/ml of MTT reagent and absorbance was measured at 550 nm after 3 hours.

**Figure S3**

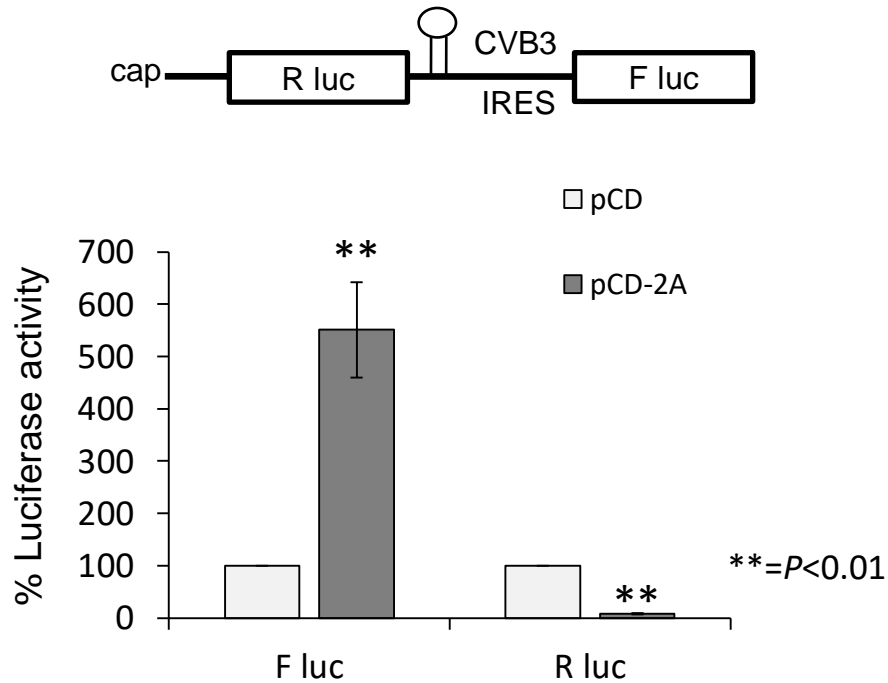

**Figure S3: Effect of 2A protease on CVB3 IRES activity using bicistronic construct.** *In vitro* transcribed capped CVB3 bicistronic RNA was transfected in cells previously transfected with plasmid expressing 2A protease or vector control. 8 hours post transfection of bicistronic RNA, cells were processed for luciferase assay. F luc activity represents CVB3 IRES mediated translation and R luc activity represents cap-dependent translation.

**Figure S4**

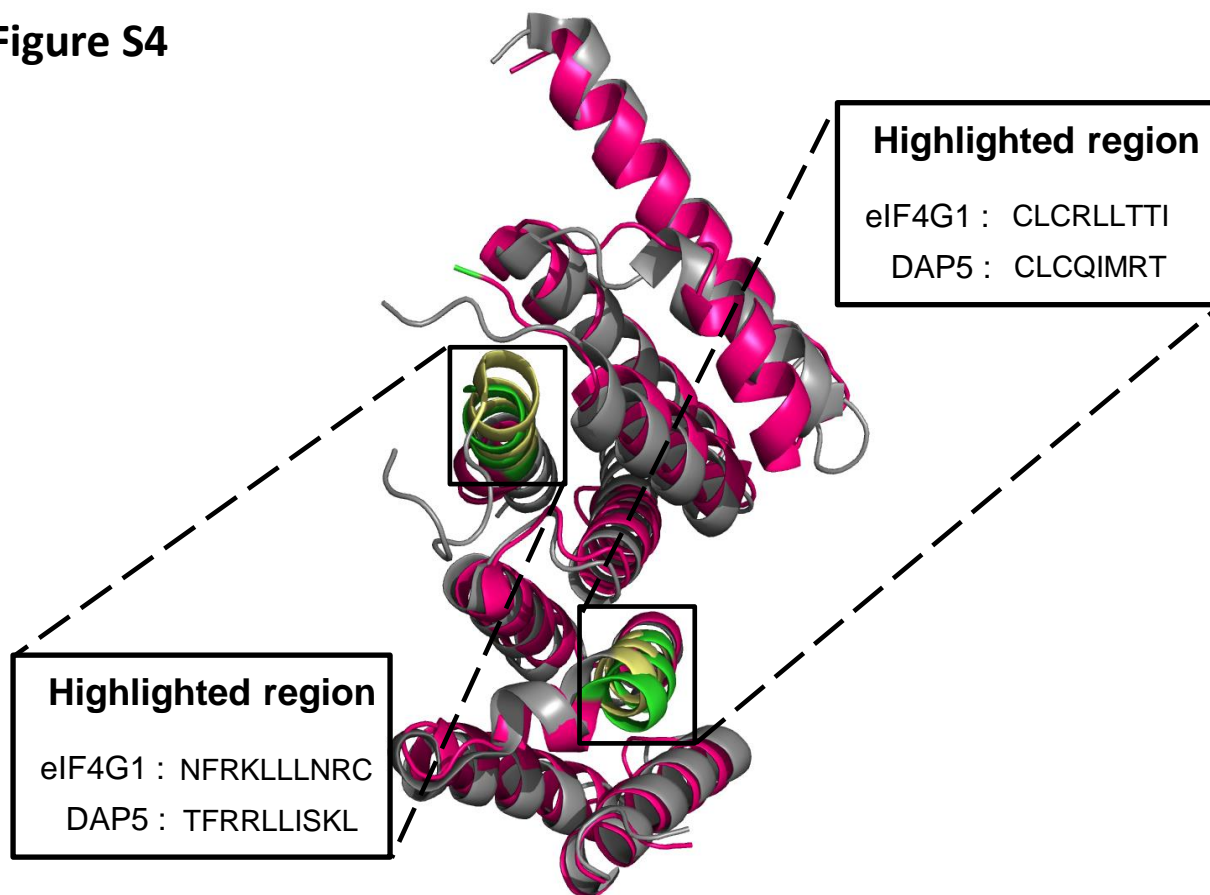

**Figure S4:** Structural alignment of MIF4G domains of DAP5 (grey) and eIF4GI (magenta). The CVB3 IRES interacting regions (adapted from de Breyne et al., 2009, [\(5\)](#)) in DAP5 and eIF4GI are indicated by yellow and green color respectively. The amino acid composition in the interacting region is indicated in the box.

Figure S5

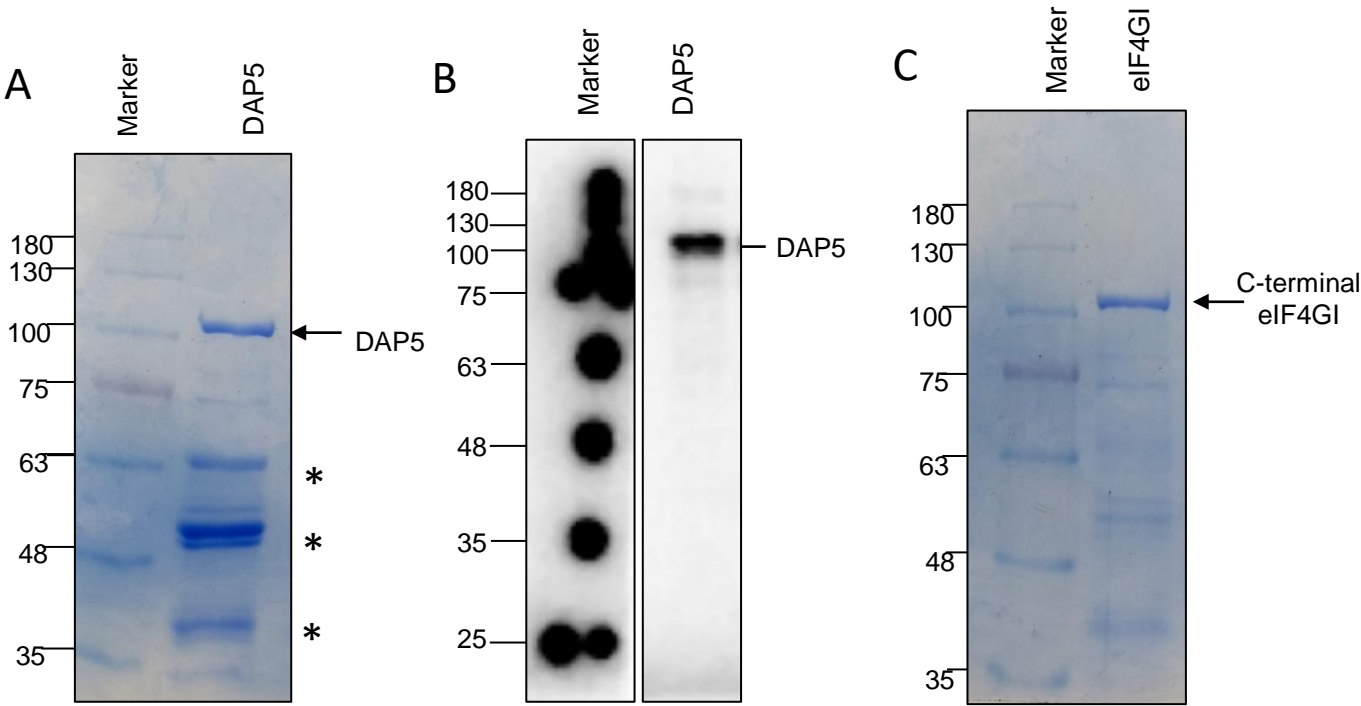

**Figure S5.A.** Purified recombinant DAP5 protein from bacteria. The \* mark indicates the bacterial contaminants that co-purified along with DAP5 protein. **B.** UV crosslinking experiment carried out with recombinant protein obtained in panel A. As can be observed in the gel, the contaminant proteins were not found to be interacting with CVB3 5'UTR. **C.** Purified recombinant C-terminal eIF4GI protein.

**Figure S6:** Multiple sequence alignment of 5' UTR from different picornaviruses. The box indicates conserved eIF4GI and DAP5 binding sites. KF537633.1- Human poliovirus 1, DQ890386.1- Human poliovirus 2, KJ849619.1-Human coxsackievirus B1, MG780414.1- Coxsackievirus B1, AJ493062.2- Human enterovirus 77, JQ729993.1- Human echovirus 6, AB705308.1- Echovirus E6, KC570453.1- Human enterovirus 71, M33854.1- Coxsackievirus B3, M88483.1- Coxsackievirus B3
